# Supplementary material
Source: PubMed Central journal article supplement (PMC7254869)
Supplement: NIHMS1585467-supplement-Flowchart.pdf [file NIHMS1585467-supplement-Flowchart.pdf]

Framingham QCT Study  
n=3,529

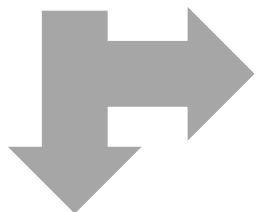

Exclusion due to missing  
CT scans at L3 (n=186).

Participants with valid  
QCT data  
n=3,343

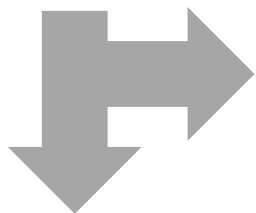

Exclusion due to missing  
or invalid FFQ (n=318),  
BMI (n=4), smoking  
(n=1), calcium  
supplement use (n=53)  
and in women estrogen  
use (n=341).

Participants with valid  
FFQ and covariate data  
n=2,626  
  
(men n=1,522)  
(women n=1,104)

Supplemental figure 1: Flowchart.
